# Supplementary material for: Evaluation of canine 2D cell cultures as models of myxomatous mitral valve degeneration
Source: PubMed Central journal article supplement (PMC6695117; doi:10.1371/journal.pone.0221126), 2019-08-15
Supplement: pone.0221126.s001.pdf [file pone.0221126.s001.pdf]

**S1 Table . Details of antibodies used. IF, immunofluorescence and protein; WB Western protein immuno-blotting; VIC, valve interstitial cell; VEC, valve endothelial cell; EndoMT, endothelial-to-mesenchymal transition.**

| <b>Antibody antigen</b>   | <b>Application</b>                                                | <b>Source</b>     | <b>Catalogue number</b> | <b>IF dilution</b> | <b>WB dilution</b> | <b>MW (kDa)</b> |
|---------------------------|-------------------------------------------------------------------|-------------------|-------------------------|--------------------|--------------------|-----------------|
| $\alpha$ SMA              | Marker of activation of VICs, enhanced differentiation and EndoMT | Mouse monoclonal  | Sigma-Aldrich A2547     | 1:200              | 1:1000             | 42              |
| SM22- $\alpha$            | Myofibroblast differentiation marker                              | Rabbit polyclonal | Abcam AB14106           | -                  | 1:1000             | 23              |
| Versican                  | Proteoglycan                                                      | Rabbit polyclonal | Millipore AB1033        | -                  | 1:100              | 1000 (core 400) |
| CD31                      | Standard VEC marker                                               | Rabbit polyclonal | Abcam AB28364           | -                  | 1:100              | 130             |
| HAS-2                     | EndoMT marker                                                     | Mouse monoclonal  | Abcam AB140671          | -                  | 1:500              | 64              |
| $\beta$ -actin            | Loading control                                                   | Mouse monoclonal  | Abcam AB6276            | -                  | 1:20000            | 42              |
| Alexafluor 488 anti-mouse | Fluorescent secondary antibody(IF)                                | Goat IgG (H+L)    | Invitrogen A10667       | 1:100              | -                  | -               |
| HRP anti-mouse            | Secondary antibody (WB)                                           | Rabbit            | DAKO P0260              | -                  | 1:1000             | -               |
| HRP anti-rabbit           | Secondary antibody (WB)                                           | Swine             | DAKO P0217              | -                  | 1:3000             | -               |
